# Supplementary material for: Exogenous Calcium Induces Different Hydraulic Strategies in Response to Osmotic Stress in Maize Seedlings
Source: MDPI journal article supplement (doi:10.3390/plants12101999), 2023-05-16
Supplement: s1 [file s1]

**Table S1.** Relative expression of core ABA signaling components during osmotic stress.

| Treatment |            | -PEG         |              |              | +PEG         |             |              |
|-----------|------------|--------------|--------------|--------------|--------------|-------------|--------------|
|           |            | 0h Calcium   | 2h Calcium   | 10d Calcium  | 0h Calcium   | 2h Calcium  | 10d Calcium  |
| Leaf      | ZmABI1     | 1.00±0.085cd | 1.10±0.068c  | 1.37±0.081b  | 0.88±0.082d  | 1.07±0.083c | 1.73±0.097a  |
|           | ZmABI2     | 1.00±0.267e  | 1.15±0.136e  | 3.05±0.086d  | 5.63±0.318a  | 5.06±0.440c | 6.64±0.245b  |
|           | ZmPP2CA    | 1.00±0.006c  | 1.16±0.031b  | 1.23±0.067ab | 1.19±0.039ab | 1.28±0.036a | 1.19±0.016ab |
|           | ZmSnRK2.2  | 1.00±0.24b   | 0.78±0.045b  | 0.87±0.048b  | 0.85±0.070b  | 0.77±0.154b | 2.01±0.069a  |
|           | ZmSnRK2.3  | 1.00±0.11c   | 1.01±0.046c  | 2.14±0.070c  | 7.47±0.98b   | 6.21±1.026b | 22.35±2.205a |
|           | ZmSnRK2.6  | 1.00±0.086c  | 0.83±0.071c  | 1.06±0.108c  | 2.29±0.393b  | 2.24±0.341b | 7.74±1.373a  |
|           | ZmSnRK2.10 | 1.00±0.103b  | 0.90±0.114b  | 1.39±0.138b  | 1.49±0.143b  | 1.04±0.140b | 2.64±0.205a  |
| Root      | ZmABI1     | 1.00±0.005e  | 1.27±0.033d  | 1.56±0.032bc | 1.54±0.021c  | 1.64±0.037b | 2.30±0.033a  |
|           | ZmABI2     | 1.00±0.004e  | 0.95±0.030e  | 3.25±0.087b  | 1.87±0.055c  | 1.64±0.043d | 4.20±0.094a  |
|           | ZmPP2CA    | 1.00±0.007e  | 1.00±0.005e  | 1.17±0.036d  | 3.05±0.027b  | 2.77±0.069c | 4.63±0.090a  |
|           | ZmSnRK2.2  | 1.00±0.004e  | 1.26±0.080e  | 3.95±0.030d  | 6.41±0.198b  | 5.61±0.059c | 10.48±0.280a |
|           | ZmSnRK2.3  | 1.00±0.004e  | 0.947±0.030e | 3.25±0.087b  | 1.87±0.055c  | 1.64±0.043d | 4.20±0.094a  |
|           | ZmSnRK2.6  | 1.00±0.004e  | 0.81±0.0048f | 2.42±0.014d  | 5.61±0.058b  | 3.20±0.046c | 7.59±0.046c  |
|           | ZmSnRK2.10 | 1.00±0.004d  | 0.92±0.018d  | 1.22±0.011c  | 1.59±0.033b  | 1.16±0.029c | 1.89±0.047a  |

Note: Different letters indicate statistically significant differences ( $p < 0.05$ ) after ANOVA and Duncan's test.

**Table S2.** Relative expression of ZmRBOHs during osmotic stress.

| Treatment |                | -PEG         |             |             | +PEG         |              |             |
|-----------|----------------|--------------|-------------|-------------|--------------|--------------|-------------|
|           |                | 0h Calcium   | 2h Calcium  | 10d Calcium | 0h Calcium   | 2h Calcium   | 10d Calcium |
| Leaf      | <i>ZmRBOHA</i> | 1.00±0.103c  | 0.85±0.089c | 1.65±0.258b | 2.54±0.249a  | 3.05±0.284a  | 2.53±0.169a |
|           | <i>ZmRBOHB</i> | 1.00±0.031c  | 0.71±0.031d | 1.27±0.112b | 1.22±0.044bc | 1.17±0.044bc | 2.73±0.110a |
|           | <i>ZmRBOHC</i> | 1.00±0.005e  | 1.35±0.085d | 1.74±0.037c | 1.77±0.035c  | 2.78±0.148b  | 5.35±0.141a |
|           | <i>ZmRBOHD</i> | 1.00±0.050cd | 1.13±0.023c | 2.09±0.050b | 1.11±0.061c  | 0.89±0.038d  | 2.50±0.030a |
| Root      | <i>ZmRBOHA</i> | 1.00±0.003d  | 1.13±0.039d | 2.24±0.039c | 2.22±0.062c  | 2.53±0.065b  | 2.90±0.062a |
|           | <i>ZmRBOHB</i> | 1.00±0.014c  | 0.85±0.029d | 1.26±0.022b | 1.30±0.057b  | 1.27±0.032b  | 2.71±0.058a |
|           | <i>ZmRBOHC</i> | 1.00±0.001e  | 0.91±0.022e | 1.43±0.082d | 2.24±0.067c  | 2.50±0.058b  | 3.05±0.028a |
|           | <i>ZmRBOHD</i> | 1.00±0.001e  | 1.01±0.007e | 2.04±0.032b | 1.27±0.020c  | 1.14±0.053d  | 2.58±0.060a |

Note: Different letters indicate statistically significant differences ( $p < 0.05$ ) after ANOVA and Duncan's test.

**Table S3.** Relative expression of antioxidant enzyme during osmotic stress

| Treatment |               | -PEG        |              |              | +PEG         |             |             |
|-----------|---------------|-------------|--------------|--------------|--------------|-------------|-------------|
|           |               | 0h Calcium  | 2h Calcium   | 10d Calcium  | 0h Calcium   | 2h Calcium  | 10d Calcium |
| Leaf      | <i>ZmCAT1</i> | 1.00±0.020d | 0.93±0.022d  | 1.29±0.017c  | 1.77±0.057b  | 2.34±0.108a | 2.42±0.114a |
|           | <i>ZmSOD4</i> | 1.00±0.027c | 1.01±0.018c  | 2.52±0.219a  | 1.78±0.061b  | 1.89±0.012b | 2.75±0.034a |
|           | <i>ZmcAPX</i> | 1.00±0.050e | 1.08±0.025de | 1.94±0.044b  | 1.44±0.052c  | 1.21±0.030d | 2.08±0.044a |
|           | <i>ZmGR1</i>  | 1.00±0.022d | 0.79±0.033e  | 1.59±0.023a  | 1.37±0.033b  | 1.20±0.013c | 1.68±0.105a |
| Root      | <i>ZmCAT1</i> | 1.00±0.028c | 1.95±0.597bc | 1.22±0.290bc | 1.72±0.717bc | 2.75±0.166b | 4.75±0.619a |
|           | <i>ZmSOD4</i> | 1.00±0.205c | 1.49±0.402bc | 5.48±0.044a  | 2.21±0.790bc | 2.79±0.158b | 5.82±0.621a |
|           | <i>ZmcAPX</i> | 1.00±0.015d | 1.05±0.031d  | 1.47±0.053bc | 1.37±0.041c  | 1.60±0.076b | 2.57±0.120a |
|           | <i>ZmGR1</i>  | 1.00±0.036d | 1.69±0.075c  | 2.79±0.136b  | 1.77±0.074c  | 2.46±0.214b | 4.66±0.348a |

Note: Different letters indicate statistically significant differences ( $p < 0.05$ ) after ANOVA and Duncan's test.

**Table S4.** Relative expression of ZmPIPs during osmotic stress in leaves.

| Treatment       | -PEG         |             |             | +PEG        |              |              |
|-----------------|--------------|-------------|-------------|-------------|--------------|--------------|
|                 | 0h Calcium   | 2h Calcium  | 10d Calcium | 0h Calcium  | 2h Calcium   | 10d Calcium  |
| <i>ZmPIP1;1</i> | 1.00±0.092a  | 1.00±0.038a | 0.83±0.040a | 0.45±0.051b | 0.98±0.062a  | 0.89±0.037a  |
| <i>ZmPIP1;2</i> | 1.00±0.050b  | 1.73±0.076a | 0.91±0.015b | 0.53±0.055c | 0.65±0.109c  | 0.66±0.034c  |
| <i>ZmPIP1;3</i> | 1.00±0.214b  | 1.22±0.229b | 1.12±0.062b | 1.10±0.048b | 2.18±0.113a  | 1.90±0.056a  |
| <i>ZmPIP1;4</i> | 1.00±0.030c  | 3.09±0.221a | 1.05±0.027c | 0.71±0.150c | 1.85±0.066b  | 1.93±0.040b  |
| <i>ZmPIP1;5</i> | 1.00±0.089ab | 1.15±0.208a | 1.25±0.038a | 0.39±0.030c | 0.72±0.057b  | 0.85±0.033b  |
| <i>ZmPIP2;1</i> | 1.00±0.120c  | 1.62±0.260b | 1.75±0.064b | 1.92±0.180b | 2.90±0.212a  | 3.01±0.016a  |
| <i>ZmPIP2;2</i> | 1.00±0.188c  | 1.45±0.031b | 2.13±0.093a | 0.57±0.037d | 0.70±0.109cd | 2.07±0.035a  |
| <i>ZmPIP2;3</i> | 1.00±0.188c  | 1.45±0.031b | 1.87±0.055a | 0.57±0.037d | 0.70±0.108d  | 1.50±0.035b  |
| <i>ZmPIP2;4</i> | 1.00±0.202c  | 1.57±0.062b | 2.20±0.070a | 0.49±0.019d | 0.99±0.048c  | 1.99±0.062a  |
| <i>ZmPIP2;5</i> | 1.00±0.062c  | 1.00±0.085c | 1.74±0.057a | 0.50±0.026d | 0.82±0.048c  | 1.49±0.054b  |
| <i>ZmPIP2;6</i> | 1.00±0.060c  | 1.84±0.158b | 2.47±0.047a | 0.65±0.059c | 1.80±0.269b  | 2.15±0.096ab |

Note: The relative expression was normalized with -PEG 0h treatment. Different letters indicate statistically significant differences ( $p < 0.05$ ) after ANOVA and Dun-can's test.

**Table S5.** The primers used in qRT-PCR

| Primer name         | Primer Sequence (5'-3')       | Purpose          |
|---------------------|-------------------------------|------------------|
| NCED/vp14-QF        | GGCTTCCACGGCACCTTCATCACGGGC   | Expression level |
| NCED/vp14-QR        | CGGGGAAGTCTGATCTGGGCTCCCTCTGG | Expression level |
| ABA3-QF             | CGGCAGGTGTACTTTGGGCAAA        | Expression level |
| ABA3-QR             | CGGGGTCTGATTCGGTCACTCAG       | Expression level |
| ZmA02-QF            | GGCCTCCTCTCCAGAATACC          | Expression level |
| ZmA02-QR            | ACCTCAACA GCAATGGAACC         | Expression level |
| $\beta$ -tubulin-QF | GTACCGCGCTCTCACCGTGC          | Expression level |
| $\beta$ -tubulin-QR | ACGGAACATAGCAGATGCCGTGA       | Expression level |
| Zmactin1-QF         | ATCCAGGCTGTTCTTTCGTT          | Expression level |
| Zmactin1-QR         | CATTAGGTGGTTCGGTGAGGT         | Expression level |
| SOD4-QF             | TGCTCGCCTACAAATCCA            | Expression level |
| SOD4-QR             | TAGCGTTCTCAAATGCTTAA          | Expression level |
| cAPX-QF             | CGACAAGGCCAAGCGTAA            | Expression level |
| cAPX-QR             | GCTCCCTCAAATCCAGACC           | Expression level |
| GR1-QF              | CATACAGAACAGAGCCCTCA          | Expression level |
| GR1-QR              | TTGGCAACGAAGACATCA            | Expression level |
| CAT1-QF             | CCAAGGGTTTCTTTGAGGT           | Expression level |
| CAT1-QR             | AGGGTCGAAGGAACGATAT           | Expression level |
| ZmSnRK2.2-QF        | CGAAGAATTTCCGCAAGACG          | Expression level |
| ZmSnRK2.2-QR        | TCGCCACAAAGATCCGAGAC          | Expression level |
| ZmSnRK2.3-QF        | CGCCTTCTGTCTCAGATATTTCG       | Expression level |
| ZmSnRK2.3-QR        | GCATCCGCGTCCTTGTAGTT          | Expression level |
| ZmSnRK2.6-QF        | ACATCGGTTCCGGCAACTT           | Expression level |
| ZmSnRK2.6-QR        | TCCCTCGCCACATTCTCGT           | Expression level |
| ZmSnRK2.10-QF       | AGATCCTGGCCGAGGCGAC           | Expression level |
| ZmSnRK2.10-QR       | TACACGATTTCCCCACTGCTTTC       | Expression level |
| ZmPP2CA-QF          | GATGCTGGCTCAACTGCCT           | Expression level |
| ZmPP2CA-QR          | GAAACCGCAATACCCTGTCC          | Expression level |
| ZmPP2C ABI1-QF      | CACATCGTGGTCGCCAACT           | Expression level |
| ZmPP2C ABI1-QR      | CCACCTGCTGATTCTACCCTTT        | Expression level |
| ZmPP2C ABI2-QF      | AGCACTGGGAGAAGGTCTTTGT        | Expression level |
| ZmPP2C ABI2-QR      | GGCAACGATGACATGCGAT           | Expression level |
| ZmrbohA-QF          | ATGACATTCTTCTGCTTATTGGC       | Expression level |
| ZmrbohA-QR          | ATGCTTCCCACCTCTTCGTT          | Expression level |
| ZmrbohB-QF          | ACCTTTTGAATGGCATCCG           | Expression level |
| ZmrbohB-QR          | AAGGAGTTGCACCAATCCCTAAT       | Expression level |
| ZmrbohC-QF          | GAATACGAAAGCTGCACGGGCATT      | Expression level |
| ZmrbohC-QR          | CCAAAGTATTTGCGCAGTGGAGCA      | Expression level |
| ZmrbohD-QF          | CCGGCTGCAGACGTTCTT            | Expression level |
| ZmrbohD-QR          | CCTGATCCGTGATCTTCGAAA         | Expression level |

---

|             |                          |                  |
|-------------|--------------------------|------------------|
| ZmPIP1;1-QF | CCCCTACTAGTTTACGTGGAGTTC | Expression level |
| ZmPIP1;1-QR | GCGGCATATTACACAATTGGTA   | Expression level |
| ZmPIP1;2-QF | CTCATTTTATGCGTTGGGATGT   | Expression level |
| ZmPIP1;2-QR | ACTGAAACAAGAAAACCCTGA    | Expression level |
| ZmPIP1;3-QF | GGTTCCCGTATCCTTTTATGC    | Expression level |
| ZmPIP1;3-QR | AATCCAGCTGATAGATAAACCCAC | Expression level |
| ZmPIP1;4-QF | GCCATCTACCACCAGGTGAT     | Expression level |
| ZmPIP1;4-QR | GGGCAGACAATACATTCCCC     | Expression level |
| ZmPIP1;5-QF | CACGTGGTCATCATCAGGG      | Expression level |
| ZmPIP1;5-QR | CGTATGCTGCATGGTTGCT      | Expression level |
| ZmPIP2;1-QF | CGGGTCGCCTTTTTTTTTG      | Expression level |
| ZmPIP2;1-QR | CCCTTGAGAGTCACGACATGA    | Expression level |
| ZmPIP2;2-QF | GGCCTTCTACCACCAGTACATC   | Expression level |
| ZmPIP2;2-QR | GGCCTTTCTTTAGCTCTGCTC    | Expression level |
| ZmPIP2;3-QF | AGTACGTGCTGAGAGCCAGC     | Expression level |
| ZmPIP2;3-QR | CGTACGTATCTACACTTGATCGAT | Expression level |
| ZmPIP2;4-QF | TACCGGAGCAACGCCTAAG      | Expression level |
| ZmPIP2;4-QR | GAAAACAGCAGCGAGCGA       | Expression level |
| ZmPIP2;5-QF | TGTCGTCGTTGGTTGCCT       | Expression level |
| ZmPIP2;5-QR | CACAACAATCACACTAGCTTGGA  | Expression level |
| ZmPIP2;6-QF | TTTAAGGTGAACGGAGAAGGAGA  | Expression level |
| ZmPIP2;6-QR | GAAAGCTACTGCTGCTGTGGAT   | Expression level |

---
